# Supplementary material for: Heterogeneous recyclable nano-palladium catalyzed amidation of esters using formamides as amine sources
Source: Royal Society of Chemistry journal article supplement (doi:10.1039/c5gc02985f), 2016-01-01

## Supporting Information

### Heterogeneous Recyclable Nano-Palladium Catalyzed Amidation of Esters Using Formamides as Amine Sources

*Yong-Sheng Bao,\* Lili Wang, Meilin Jia, Aiju Xu, Bao Agula,*

*Menghe Baiyin, and Bao Zhaorigetu\**

*College of Chemistry and Environmental Science, Inner Mongolia Key  
Laboratory of Green Catalysis, Inner Mongolia Normal University, Hohhot,  
Inner Mongolia 010022, China*

*\*(Y.B.) E-mail: sbbys197812@163.com.*

*\*(B.Z.) E-mail: zrgt@imnu.edu.cn.*

#### Contents

|                                                                       |    |
|-----------------------------------------------------------------------|----|
| 1. GC-MS Analysis of Reaction of <b>1a</b> with DMF <b>2a</b>         | S2 |
| 2. Characterization Data for the Products                             | S3 |
| 3. <sup>1</sup> H NMR and <sup>13</sup> C NMR Spectra of the Products | S5 |

# 1. GCMS Analysis of Reaction of 1a with DMF 2a

RT: 3.00 - 40.00

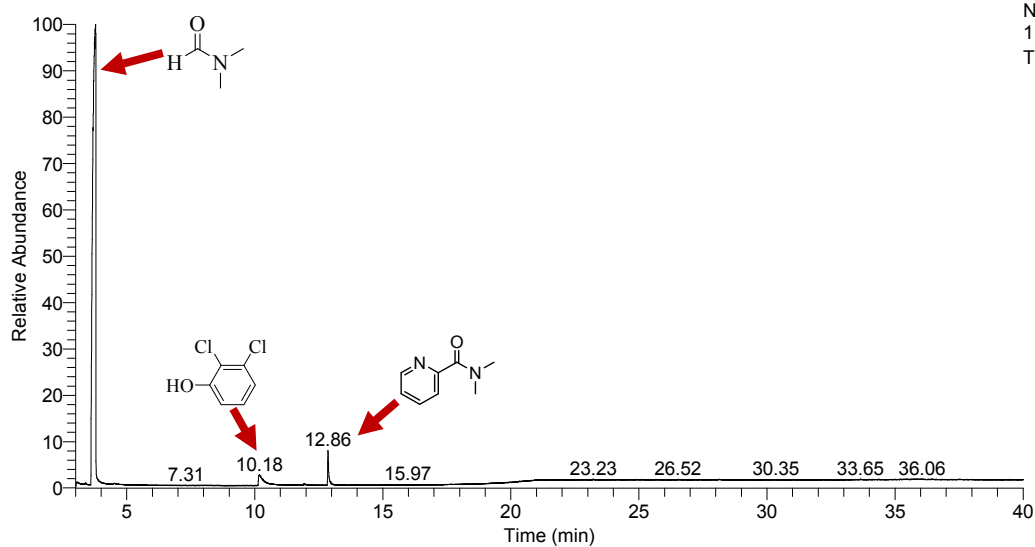

B1 #1119 RT: 3.77 AV: 1 AV: 5 SB: 12 1112-1117 1121-1126 NL: 6.81E8  
F: + c Full ms [1.00-600.00]

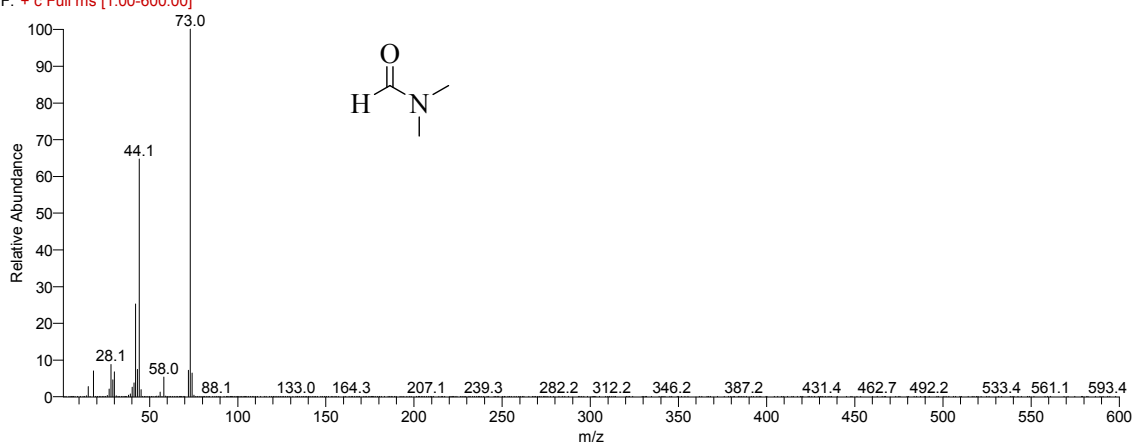

B1 #3059 RT: 10.18 AV: 1 AV: 5 SB: 12 3052-3057 3061-3066 NL: 1.12E7  
F: + c Full ms [1.00-600.00]

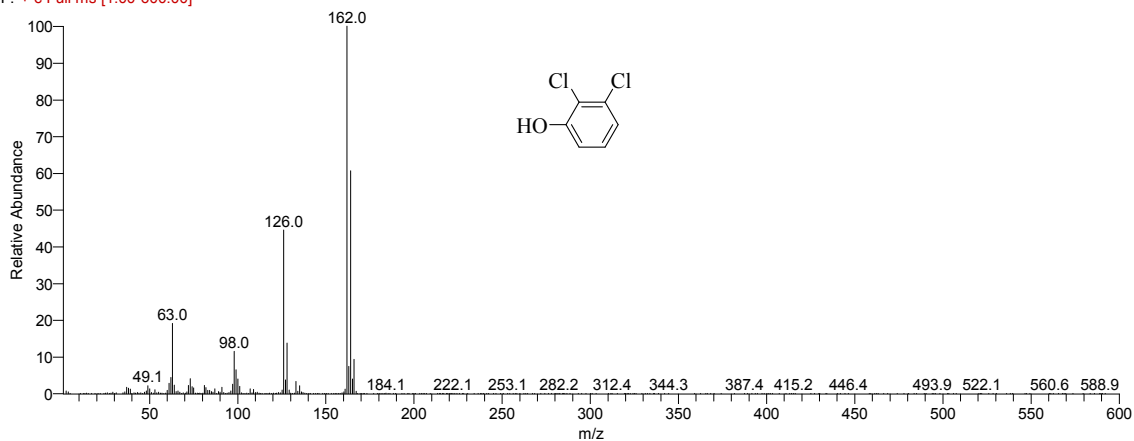

B1 #3873 RT: 12.86 AV: 1 AV: 5 SB: 12 3866-3871 3875-3880 NL: 2.73E7  
F: + c Full ms [1.00-600.00]

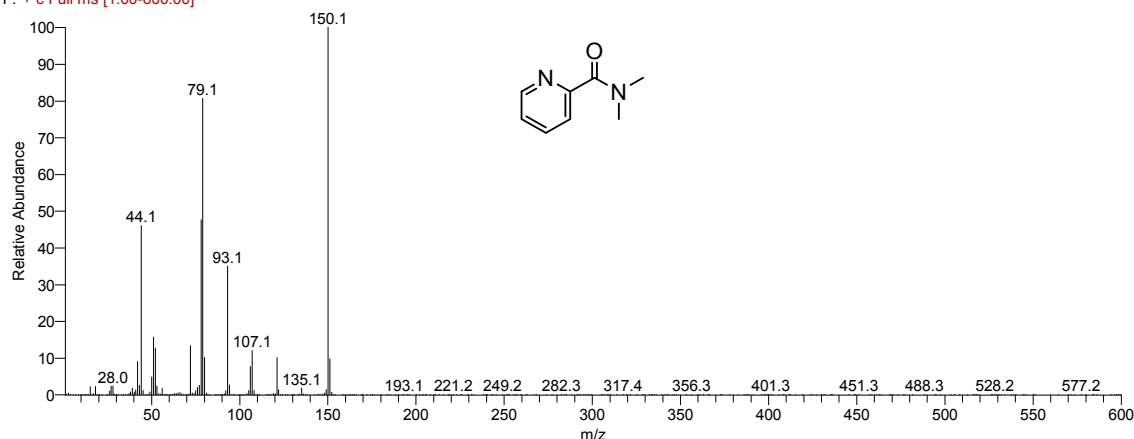

## 2. Characterization Data for the Products

*N,N*-dimethylpicolinamide **3aa**.<sup>1</sup> Yield: 90% (27.0 mg). <sup>1</sup>H NMR (500 MHz, CDCl<sub>3</sub>) δ 8.60 (s, 1H), 7.82 (td, *J* = 7.7, 1.6 Hz, 1H), 7.64 (d, *J* = 7.6 Hz, 1H), 7.40 – 7.33 (m, 1H), 3.15 (s, 3H), 3.08 (s, 3H); <sup>13</sup>C NMR (126 MHz, CDCl<sub>3</sub>) δ 168.9, 154.2, 148.1, 137.3, 124.5, 123.7, 39.0, 35.8.

*N,N*-dimethylpyrazine-2-carboxamide **3ja**.<sup>2</sup> Yield: 87% (26.3 mg). <sup>1</sup>H NMR (500 MHz, CDCl<sub>3</sub>) δ 8.95 (d, *J* = 1.3 Hz, 1H), 8.64 (d, *J* = 2.5 Hz, 1H), 8.55 (dd, *J* = 2.4, 1.6 Hz, 1H), 3.17 (s, 3H), 3.13 (s, 3H).

*N,N*-dimethylfuran-2-carboxamide **3ka**.<sup>3</sup> Yield: 90% (25.0 mg). <sup>1</sup>H NMR (500 MHz, CDCl<sub>3</sub>) δ 7.49 (d, *J* = 0.9 Hz, 1H), 7.01 (d, *J* = 3.4 Hz, 1H), 6.47 (dd, *J* = 3.4, 1.7 Hz, 1H), 3.29 (s, 3H), 3.10 (s, 3H); <sup>13</sup>C NMR (125 MHz, CDCl<sub>3</sub>) δ 160.5, 147.9, 143.9, 116.4, 111.2, 38.4, 36.6.

*N,N*-dimethylthiophene-2-carboxamide **3la**.<sup>4</sup> Yield: 91% (28.2 mg). <sup>1</sup>H NMR (500 MHz, CDCl<sub>3</sub>) δ 7.42 (dd, *J* = 5.0, 1.0 Hz, 1H), 7.34 (dd, *J* = 3.7, 1.0 Hz, 1H), 7.02 (dd, *J* = 5.0, 3.7 Hz, 1H), 3.16 (s, 6H); <sup>13</sup>C NMR (125 MHz, CDCl<sub>3</sub>) δ 164.5, 137.8, 129.2, 128.8, 126.7, 39.5, 36.6.

2-(1*H*-indol-2-yl)-*N,N*-dimethylacetamide **3ma**.<sup>5</sup> Yield: 83% (33.5 mg). <sup>1</sup>H NMR (500 MHz, CDCl<sub>3</sub>) δ 8.18 (s, 1H), 7.64 (d, *J* = 7.9 Hz, 1H), 7.35 (d, *J* = 8.1 Hz, 1H), 7.20 (t, *J* = 7.1 Hz, 1H), 7.13 (d, *J* = 7.1 Hz, 1H), 7.11 – 7.08 (m, 1H), 3.83 (s, 2H), 3.03 (s, 3H), 2.98 (s, 3H).

*N,N*-dimethylbenzamide **3na**.<sup>6</sup> Yield: 85% (25.3 mg). <sup>1</sup>H NMR (500 MHz, CDCl<sub>3</sub>) δ 7.54 – 7.32 (m, 5H), 3.10 (s, 3H), 2.96 (s, 3H); <sup>13</sup>C NMR (126 MHz, CDCl<sub>3</sub>) δ 171.8, 136.1, 129.6, 128.3, 127.0, 39.6, 35.4.

4-cyano-*N,N*-dimethylbenzamide **3oa**.<sup>6</sup> Yield: 92% (32.0 mg). <sup>1</sup>H NMR (500 MHz, CDCl<sub>3</sub>) δ 7.81 – 7.67 (m, 2H), 7.63 – 7.46 (m, 2H), 3.13 (s, 3H), 2.96 (s, 3H); <sup>13</sup>C NMR (125 MHz, CDCl<sub>3</sub>) δ 169.6, 140.6, 132.4, 127.8, 118.1, 113.4, 39.4, 35.4.

4-bromo-*N,N*-dimethylbenzamide **3pa**.<sup>6</sup> Yield: 88% (39.9 mg). <sup>1</sup>H NMR (500 MHz, CDCl<sub>3</sub>) δ 7.63 – 7.45 (m, 2H), 7.31 – 7.27 (m, 2H), 3.09 (s, 3H), 2.97 (s, 3H); <sup>13</sup>C NMR (125 MHz, CDCl<sub>3</sub>) δ 170.6, 135.1, 131.6, 128.8, 123.8, 39.6, 35.4.

*N,N*-dimethyl-4-(trifluoromethyl)benzamide **3qa**.<sup>4</sup> Yield: 87% (37.8 mg). <sup>1</sup>H NMR (500 MHz, CDCl<sub>3</sub>) δ 7.67 (d, *J* = 8.1 Hz, 2H), 7.52 (d, *J* = 8.1 Hz, 2H), 3.13 (s, 3H), 2.96 (s, 3H); <sup>13</sup>C NMR (125 MHz, CDCl<sub>3</sub>) δ 170.2, 139.8, 131.5 (q, *J*<sub>C-F</sub> = 32.6 Hz), 127.4, 125.5 (q, *J*<sub>C-F</sub> = 3.8 Hz), 123.7 (q, *J*<sub>C-F</sub> = 272.5 Hz), 39.4, 35.3.

*piperidin-1-yl(pyridin-2-yl)methanone 3bb.*<sup>7</sup> Yield: 79% (30.0 mg). <sup>1</sup>H NMR (500 MHz, CDCl<sub>3</sub>) δ 8.59 (s, 1H), 7.82 (t, *J* = 7.4 Hz, 1H), 7.69 (d, *J* = 7.3 Hz, 1H), 7.36 (s, 1H), 3.88 – 3.76 (m, 4H), 3.76 – 3.61 (m, 6H).

morpholino(pyridin-2-yl)methanone **3bc.**<sup>8</sup> Yield: 81% (31.1 mg). <sup>1</sup>H NMR (500 MHz, CDCl<sub>3</sub>) δ 8.60 (d, *J* = 3.7 Hz, 1H), 7.84 (t, *J* = 7.7 Hz, 1H), 7.70 (d, *J* = 7.7 Hz, 1H), 7.45 – 7.33 (m, 1H), 3.91 – 3.76 (m, 4H), 3.76 – 3.59 (m, 4H).

*N*-methylpicolinamide **3bd.**<sup>9</sup> Yield: 91% (24.9 mg). <sup>1</sup>H NMR (500 MHz, CDCl<sub>3</sub>) δ 8.53 (d, *J* = 4.5 Hz, 1H), 8.18 (d, *J* = 7.8 Hz, 1H), 8.09 (s, 1H), 7.89 – 7.66 (m, 1H), 7.41 (dd, *J* = 7.1, 5.1 Hz, 1H), 3.03 (d, *J* = 5.1 Hz, 3H); <sup>13</sup>C NMR (126 MHz, CDCl<sub>3</sub>) δ 165.2, 149.8, 148.1, 137.4, 126.2, 122.1, 26.1.

*N*-phenylpicolinamide **3be.**<sup>10</sup> Yield: 74% (29.3 mg). <sup>1</sup>H NMR (500 MHz, CDCl<sub>3</sub>) δ 10.04 (s, 1H), 8.62 (d, *J* = 4.3 Hz, 1H), 8.31 (d, *J* = 7.8 Hz, 1H), 7.91 (t, *J* = 7.7 Hz, 1H), 7.79 (d, *J* = 8.0 Hz, 2H), 7.55 – 7.45 (m, 1H), 7.39 (t, *J* = 7.8 Hz, 2H), 7.15 (t, *J* = 7.4 Hz, 1H).

4-cyano-*N*-methylbenzamide **3od.**<sup>11</sup> Yield: 89% (28.5 mg). <sup>1</sup>H NMR (500 MHz, CDCl<sub>3</sub>) δ 7.87 (d, *J* = 8.2 Hz, 2H), 7.74 (d, *J* = 8.2 Hz, 2H), 6.34 (s, 1H), 3.04 (d, *J* = 4.8 Hz, 3H); <sup>13</sup>C NMR (126 MHz, CDCl<sub>3</sub>) δ 166.4, 138.5, 132.5(2C), 127.6(2C), 118.0, 115.0, 27.1.

4-cyano-*N*-phenylbenzamide **3oe.**<sup>12</sup> Yield: 63% (28.0 mg). <sup>1</sup>H NMR (500 MHz, CDCl<sub>3</sub>) δ 7.98 (d, *J* = 8.2 Hz, 2H), 7.84 (s, 1H), 7.79 (d, *J* = 8.3 Hz, 2H), 7.63 (d, *J* = 7.9 Hz, 2H), 7.40 (t, *J* = 7.9 Hz, 2H), 7.20 (t, *J* = 7.4 Hz, 1H); <sup>13</sup>C NMR (126 MHz, CDCl<sub>3</sub>) δ 163.9, 138.9, 137.3, 132.7, 129.3, 127.8, 125.3, 120.4, 117.9, 115.5.

4-cyano-*N,N*-diethylbenzamide **3of.**<sup>13</sup> Yield: 72% (29.1 mg). <sup>1</sup>H NMR (500 MHz, CDCl<sub>3</sub>) δ 7.71 (d, *J* = 8.3 Hz, 2H), 7.48 (d, *J* = 8.3 Hz, 2H), 3.56 (q, *J* = 6.9 Hz, 2H), 3.21 (q, *J* = 6.8 Hz, 2H), 1.29 – 1.24 (m, 3H), 1.12 (t, *J* = 5.9 Hz, 3H); <sup>13</sup>C NMR (126 MHz, CDCl<sub>3</sub>) δ 169.4, 141.4, 132.4, 127.1, 118.2, 113.1, 43.3, 39.6, 14.2, 12.8.

## References:

- [1] I. Okamoto, M. Terashima, H. Masu, M. Nabeta, K. Ono, N. Morita, K. Katagiri, I. Azumaya, O. Tamura *Tetrahedron* 2011, 67, 8536.
- [2] H. Tanaka, X. Liu, D. Kawabata, H. Chuman, C. Yamagami *Chemical & Pharmaceutical Bulletin* 2005, 53, 374.
- [3] T. Kinoshita, D. Icbinari, J. Sinya, *Journal of Heterocyclic Chemistry* 1996, 33, 1313.
- [4] J. Ju, M. Jeong, J. Moon, H. M. Jung, S. Lee *Org. Lett.* 2007, 9, 4615.
- [5] V. Snieckus, K. S. Bhandari *Tetrahedron Letters* 1969, 39, 3375.
- [6] S. Hanada, E. Tsutsumi, Y. Motoyama, H. Nagashima *J. Am. Chem. Soc.* 2009, 131, 15032.
- [7] M. Zhu, K. Fujita, R. Yamaguchi *J. Org. Chem.* 2012, 77, 9102-9109.
- [8] S. N. Gockel, K. L. Hull *Org. Lett.* 2015, 17, 3236-3239.
- [9] S. Cai, C. Chen, P. Shao, C. Xi *Org. Lett.* 2014, 16, 3142-3145.
- [10] Q. Li, S. Y. Zhang, G. He, Z. Ai, W. A. Nack, G. Chen *Org. Lett.* 2014, 16, 1764-1767.
- [11] R. H. Miller, O. Gisvold *Journal of the American Pharmaceutical Association* 1953, 42, 369.
- [12] R. J. Perry, B. D. Wilson *J. Org. Chem.* 1996, 61, 7482-7485.
- [13] X. Wang, D. Z. Wang *Tetrahedron* 2011, 67, 3406.

### 3. <sup>1</sup>H NMR and <sup>13</sup>C NMR Spectra of the Products

#### <sup>1</sup>H NMR of *N,N*-dimethylpicolinamide **3aa**

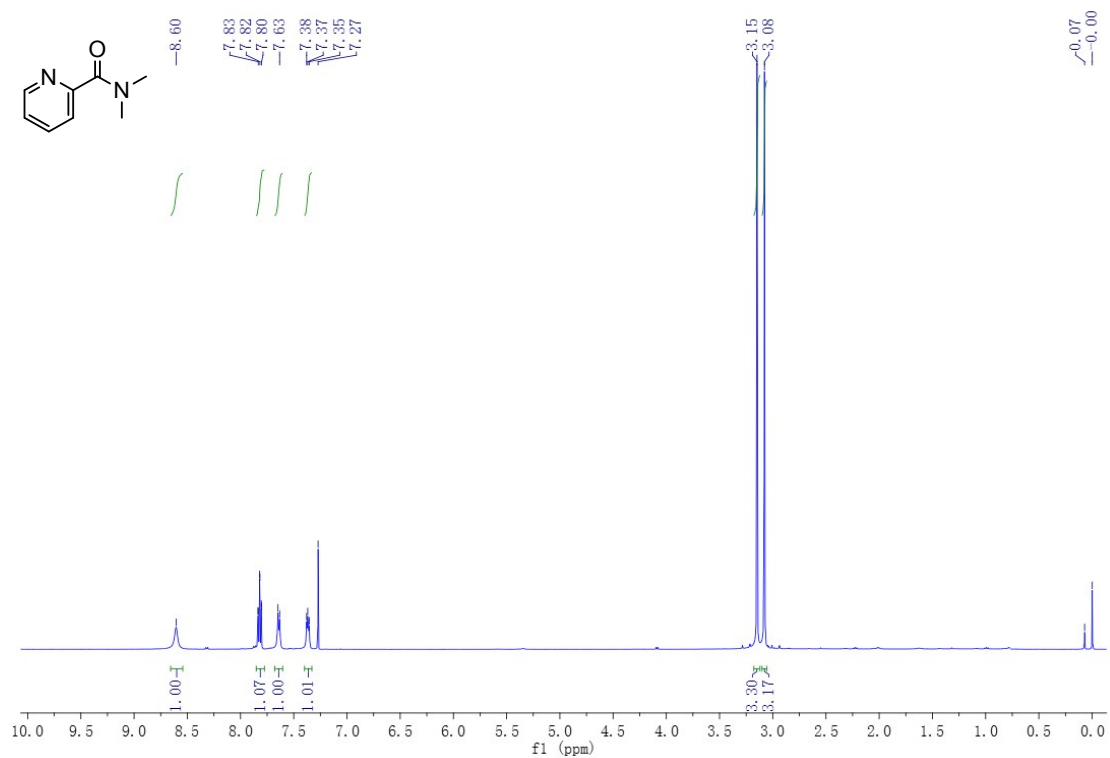

#### <sup>13</sup>C NMR of *N,N*-dimethylpicolinamide **3aa**

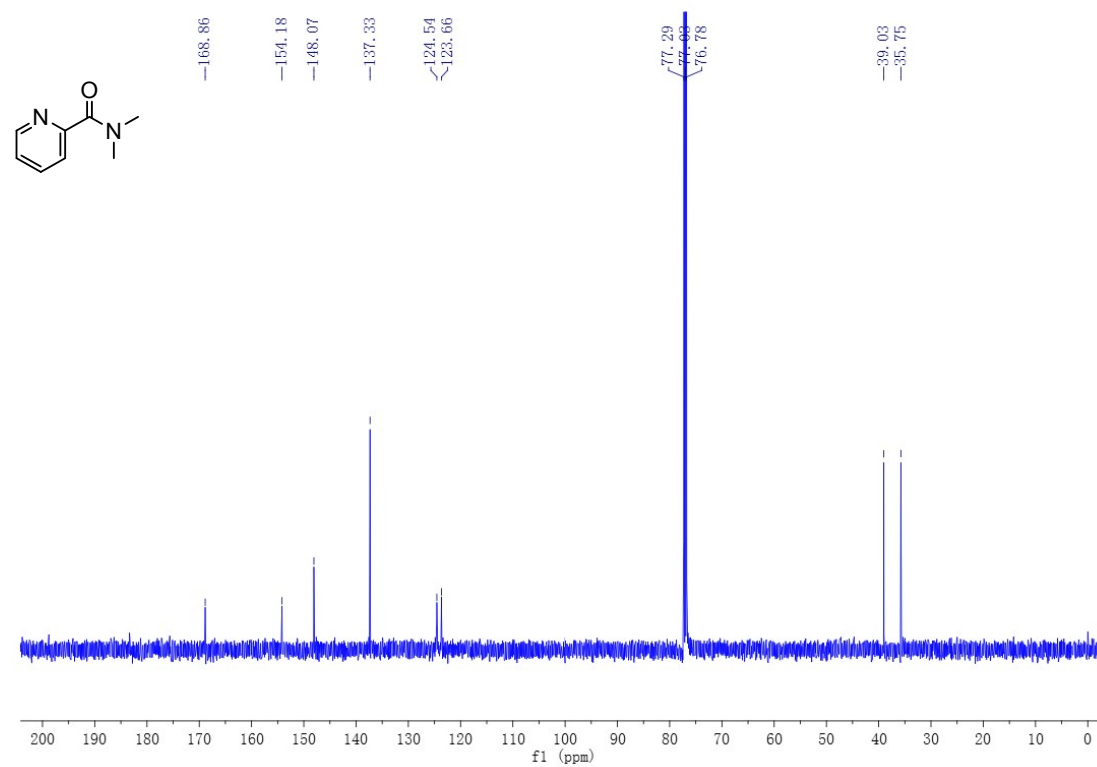

<sup>1</sup>H NMR of *N,N*-dimethylpyrazine-2-carboxamide **3ja**

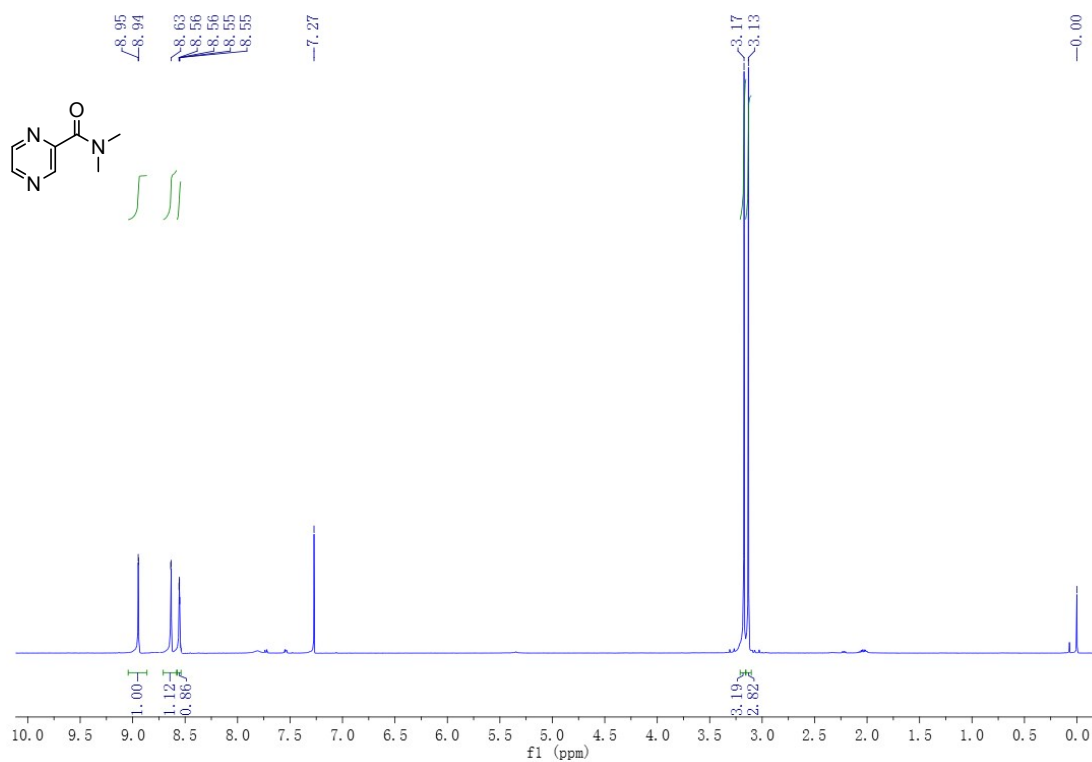

<sup>1</sup>H NMR of *N,N*-dimethylfuran-2-carboxamide **3ka**

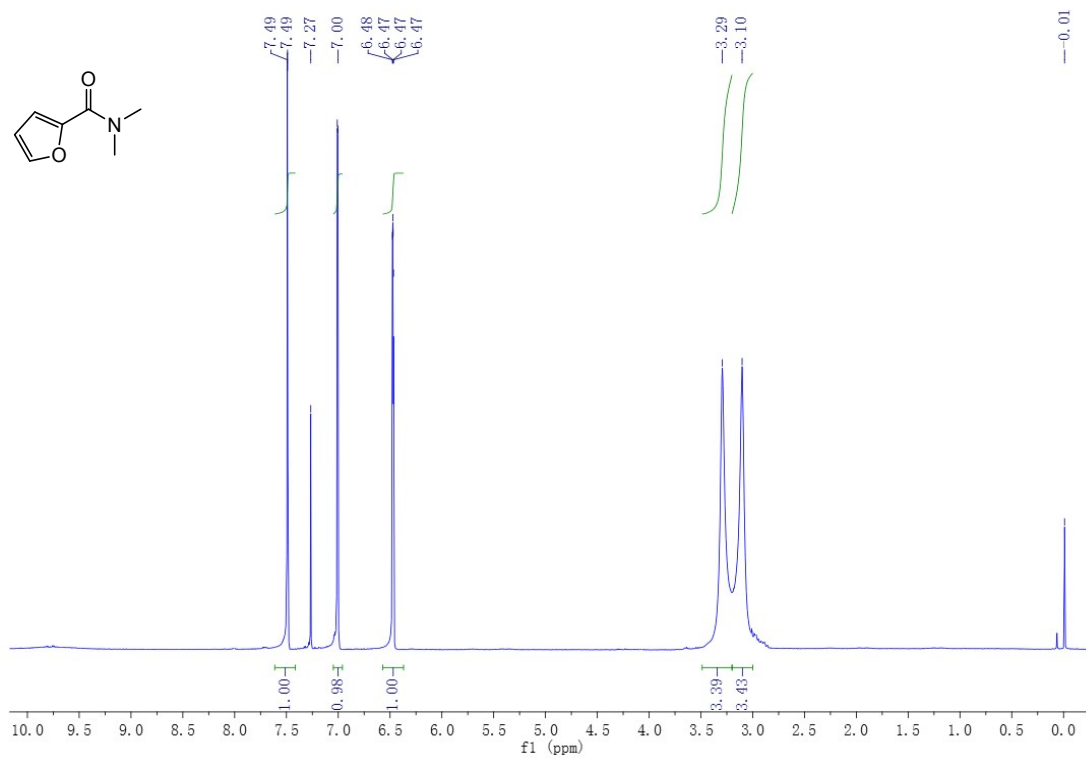

$^{13}\text{C}$  NMR of *N,N*-dimethylfuran-2-carboxamide **3ka**

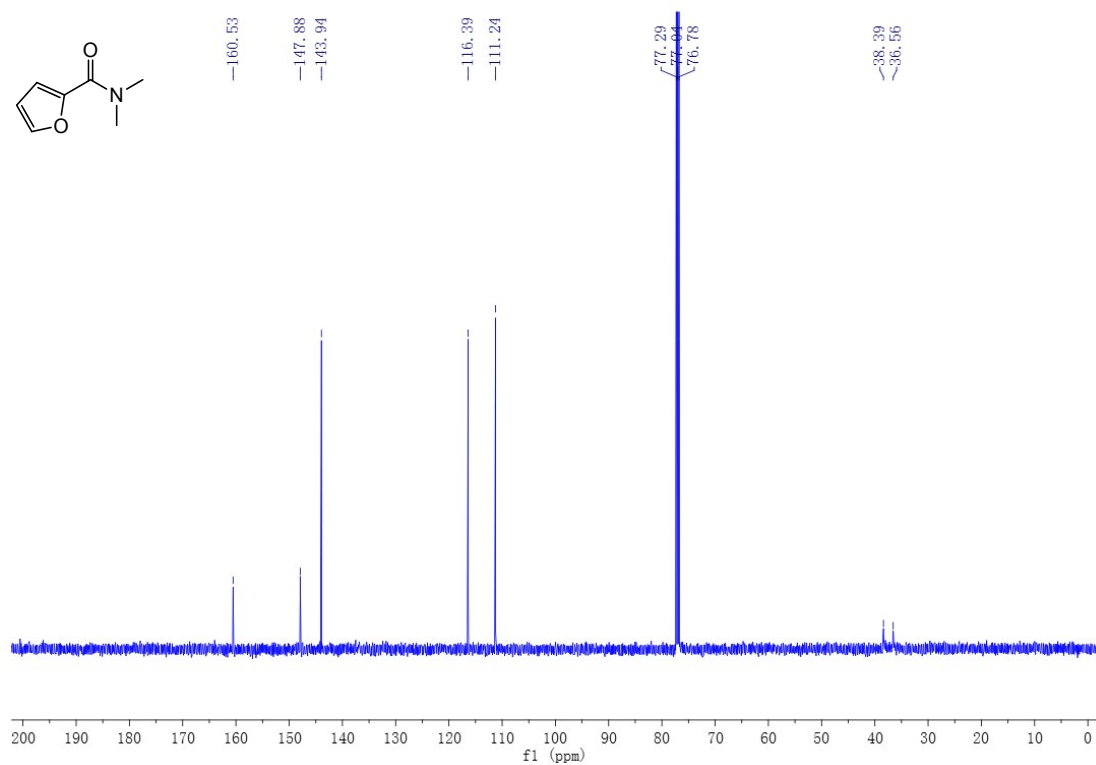

$^1\text{H}$  NMR of *N,N*-dimethylthiophene-2-carboxamide **3la**

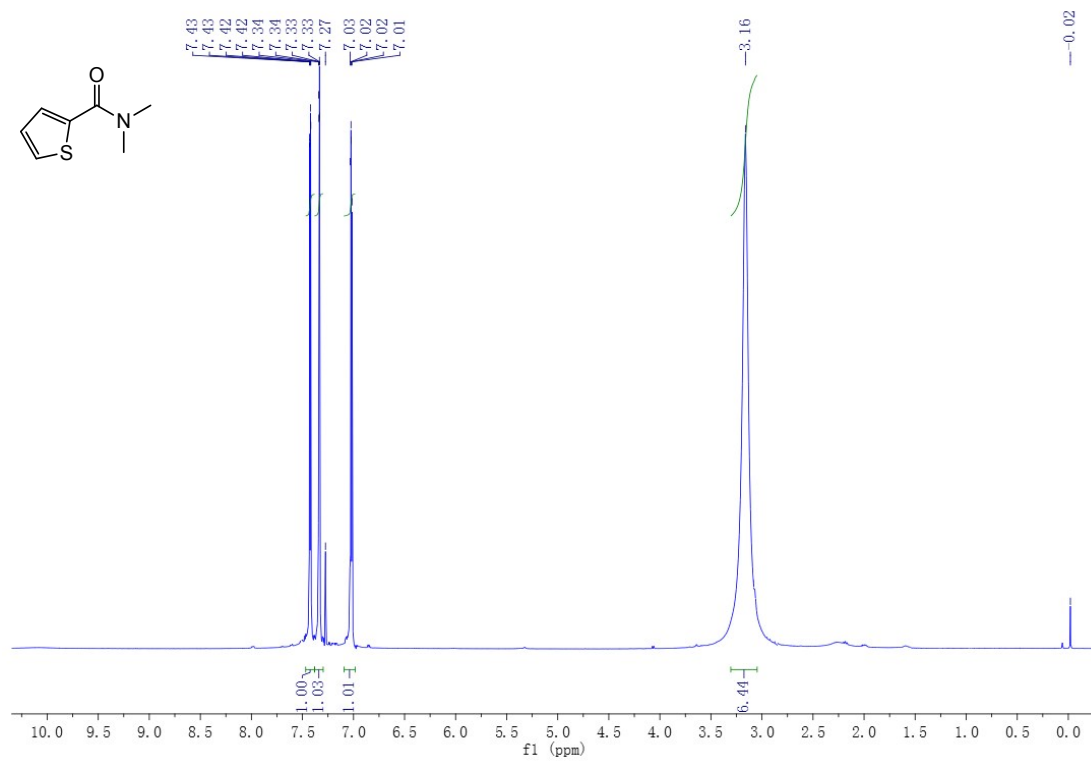

<sup>13</sup>C NMR of *N,N*-dimethylthiophene-2-carboxamide **3la**

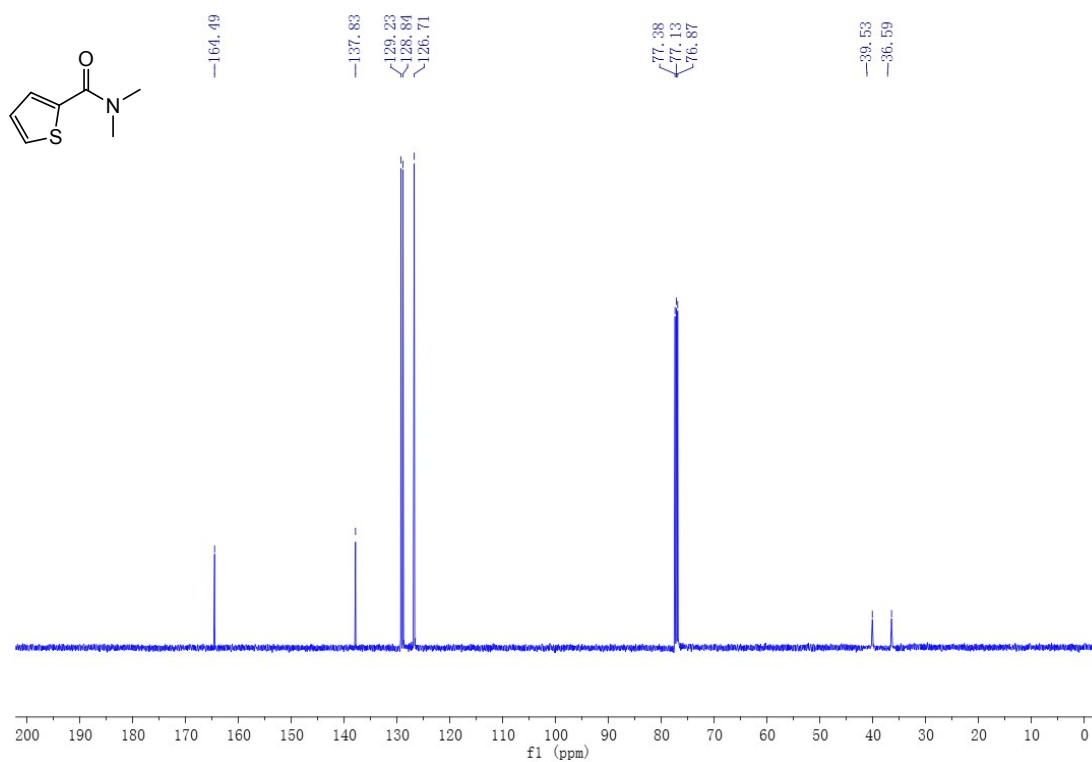

<sup>1</sup>H NMR of 2-(1*H*-indol-2-yl)-*N,N*-dimethylacetamide **3ma**

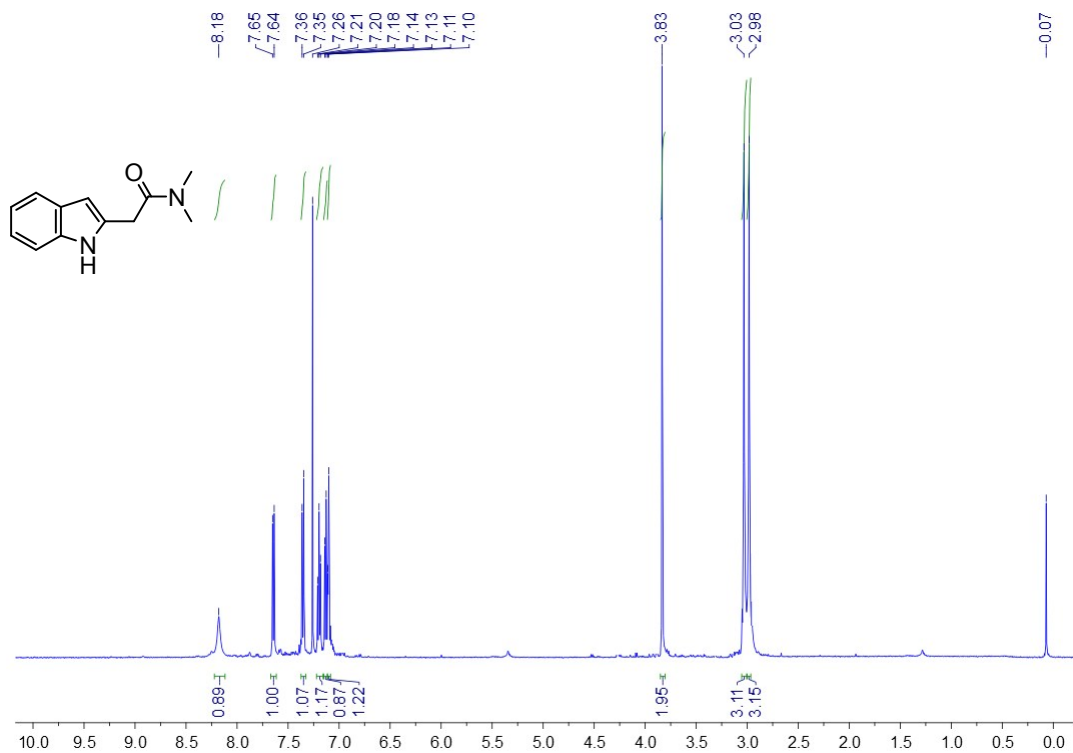



<sup>1</sup>H NMR of *N,N*-dimethylbenzamide **3na**

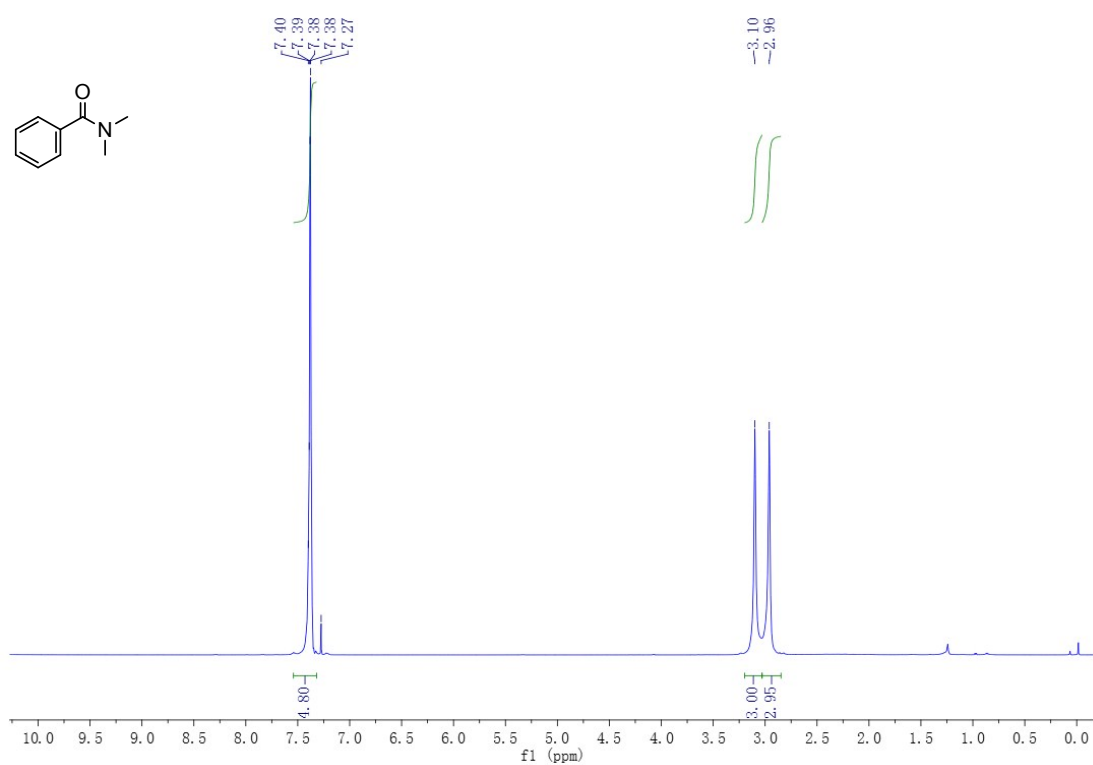

<sup>13</sup>C NMR of *N,N*-dimethylbenzamide **3na**

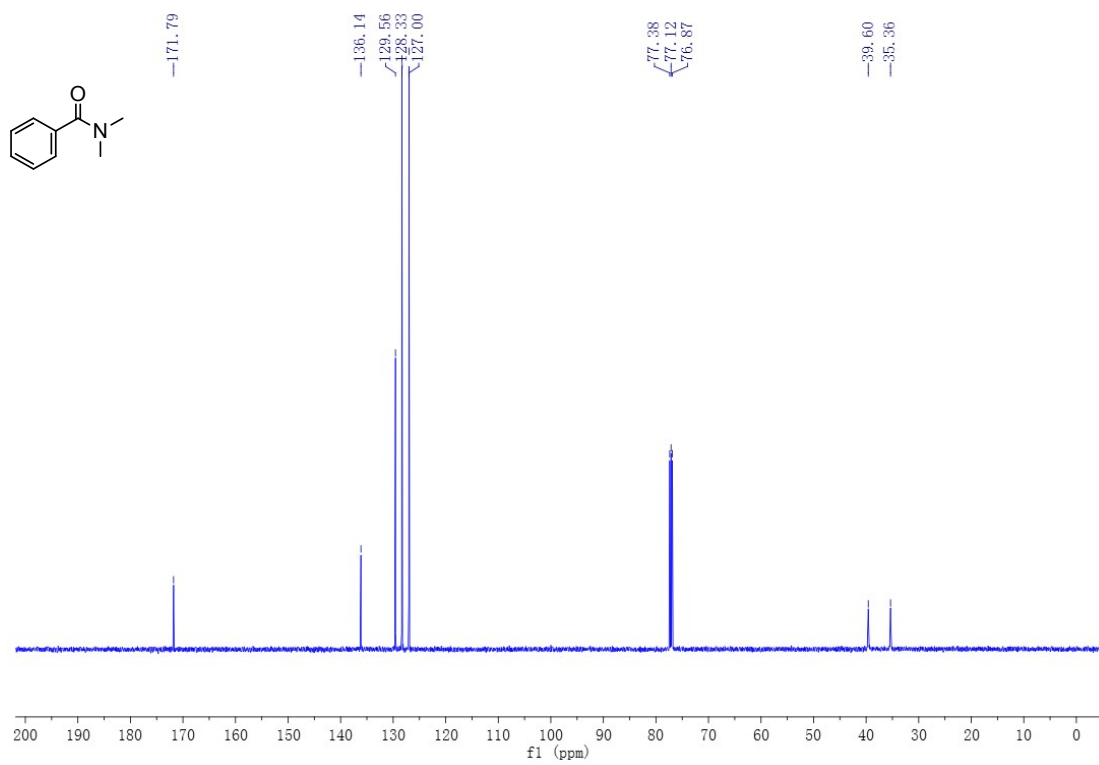

<sup>1</sup>H NMR of 4-cyano-N,N-dimethylbenzamide **30a**

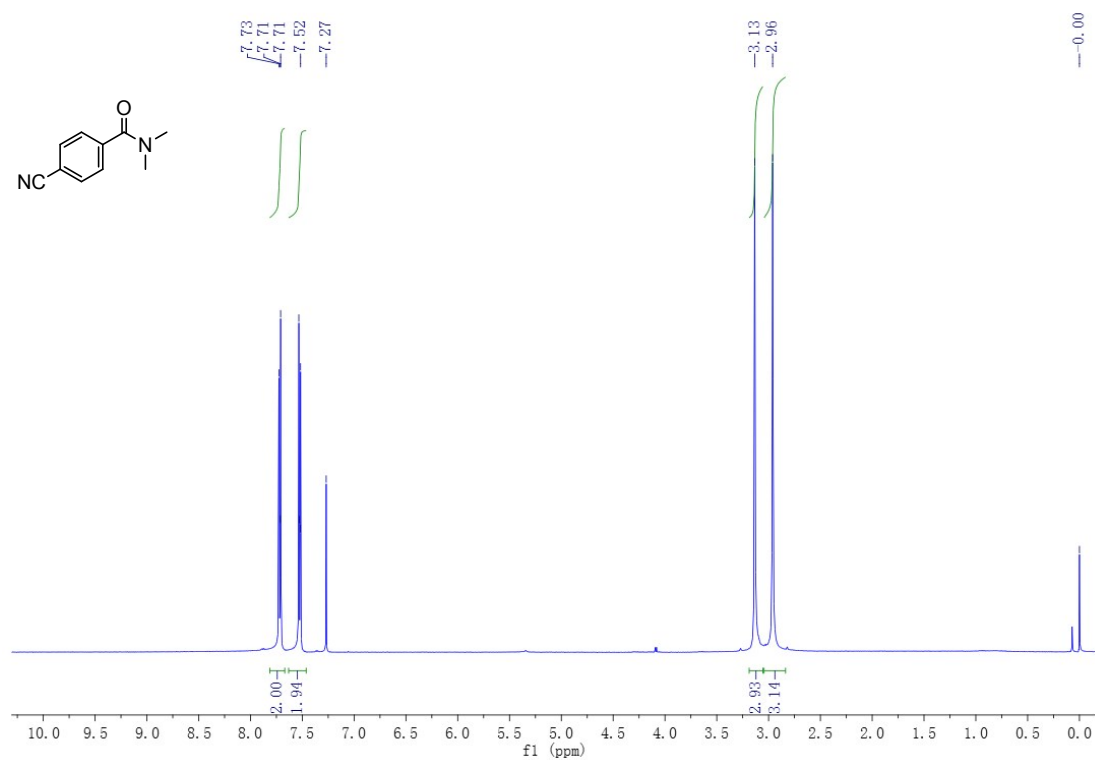

<sup>13</sup>C NMR of 4-cyano-N,N-dimethylbenzamide **30a**

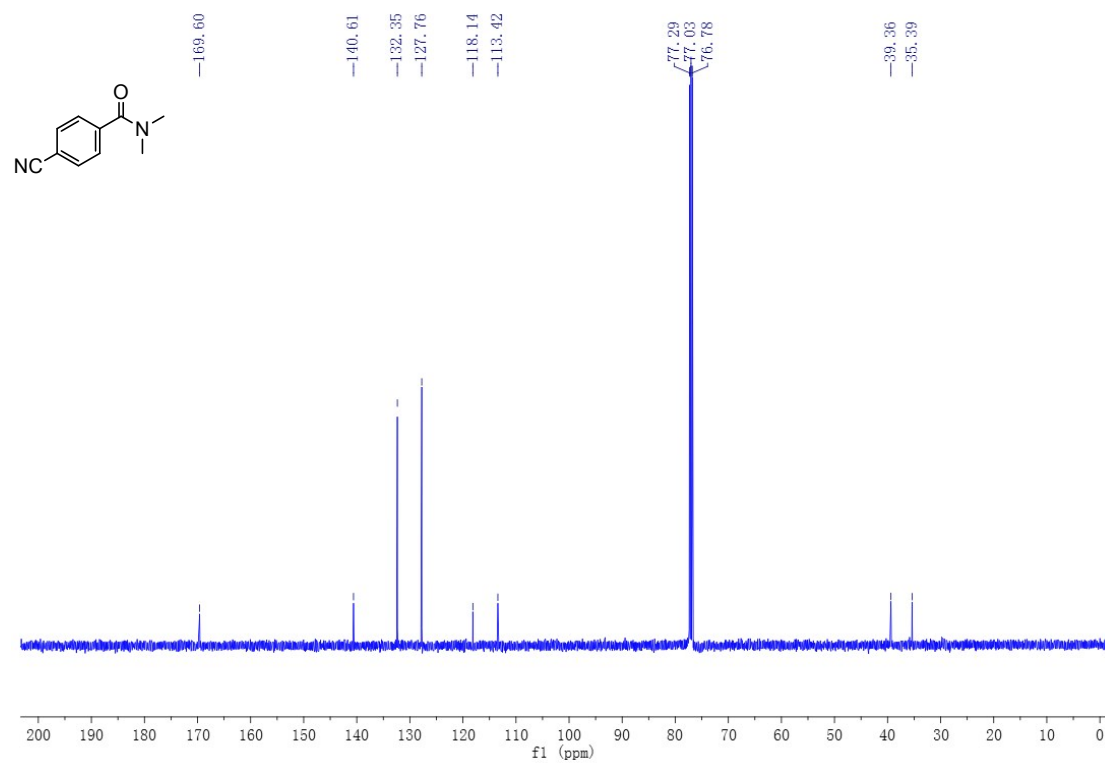

<sup>1</sup>H NMR of 4-bromo-N,N-dimethylbenzamide **3pa**

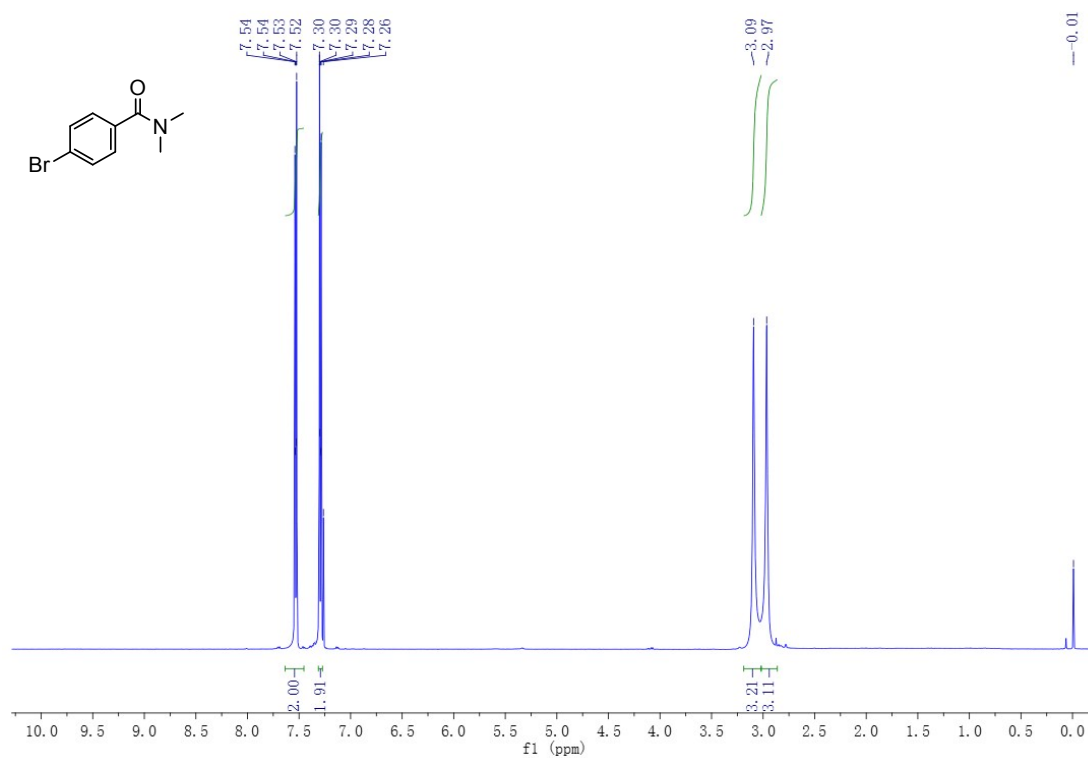

<sup>13</sup>C NMR of 4-bromo-N,N-dimethylbenzamide **3pa**

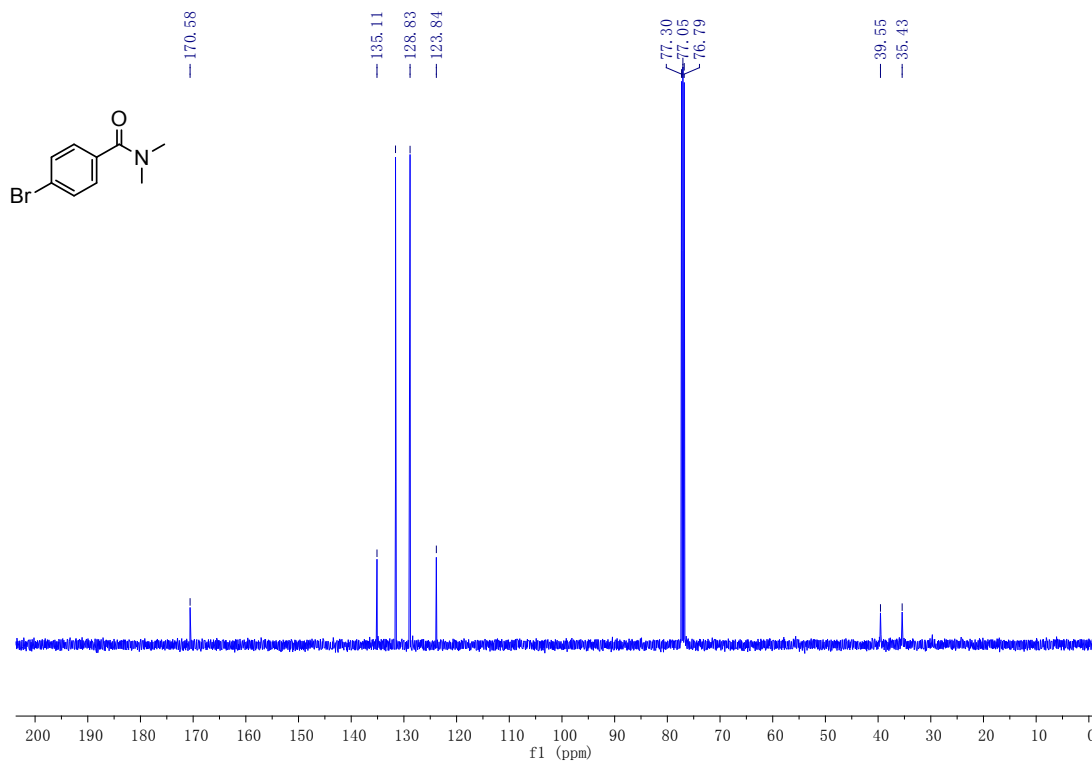

<sup>1</sup>H NMR of *N,N*-dimethyl-4-(trifluoromethyl)benzamide **3qa**

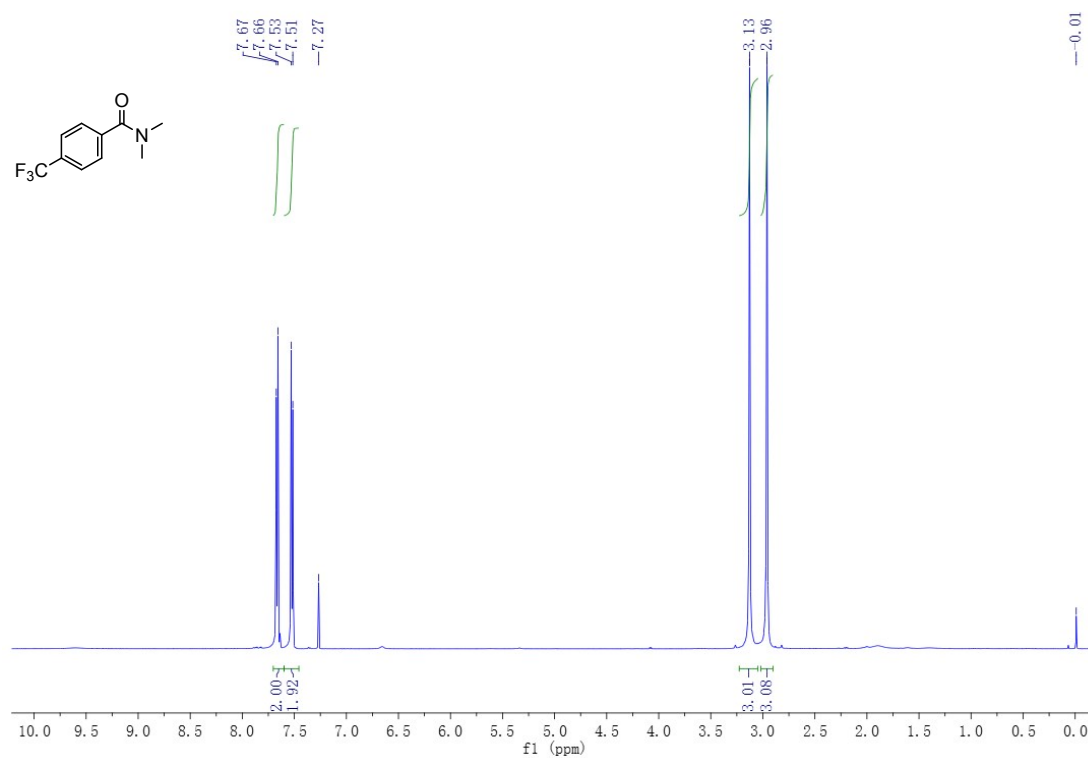

<sup>13</sup>C NMR of *N,N*-dimethyl-4-(trifluoromethyl)benzamide **3qa**

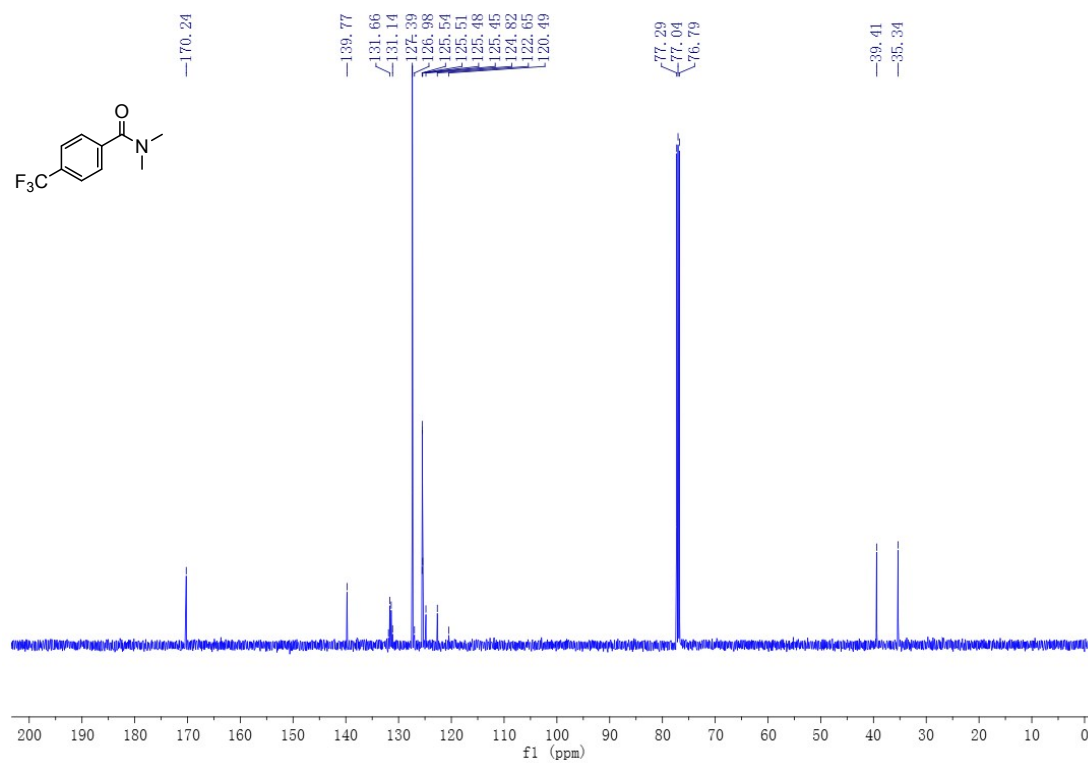

<sup>1</sup>H NMR of piperidin-1-yl(pyridin-2-yl)methanone **3bb**

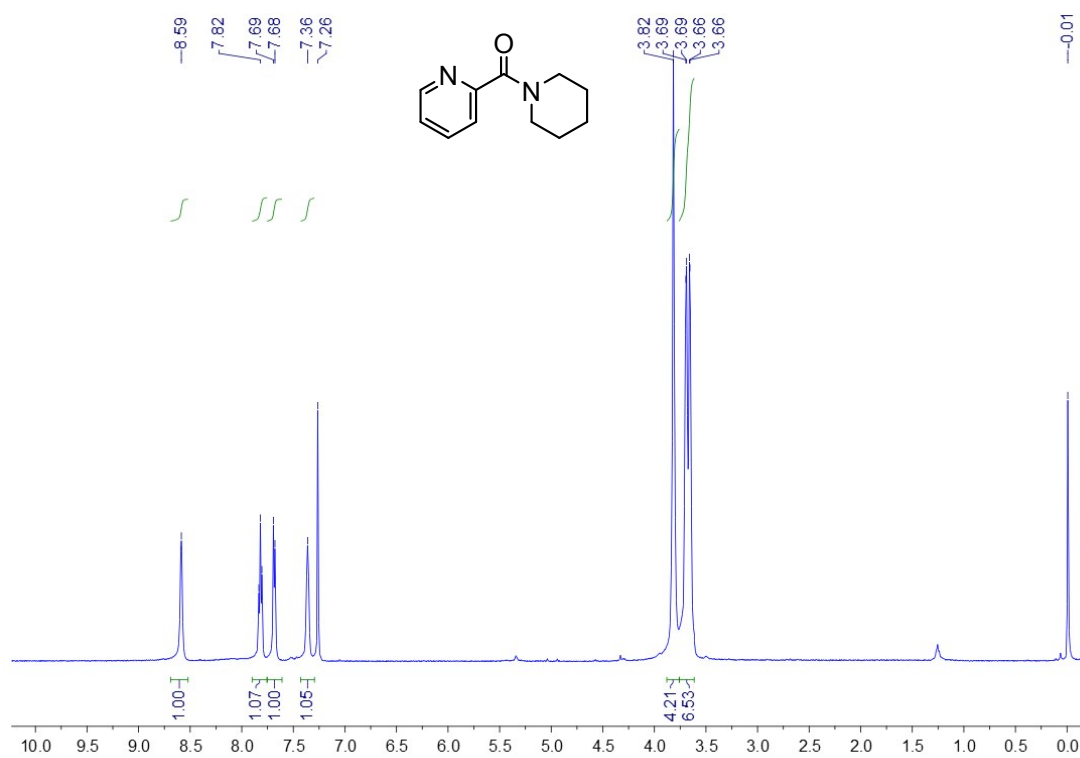

<sup>1</sup>H NMR of morpholino(pyridin-2-yl)methanone **3bc**

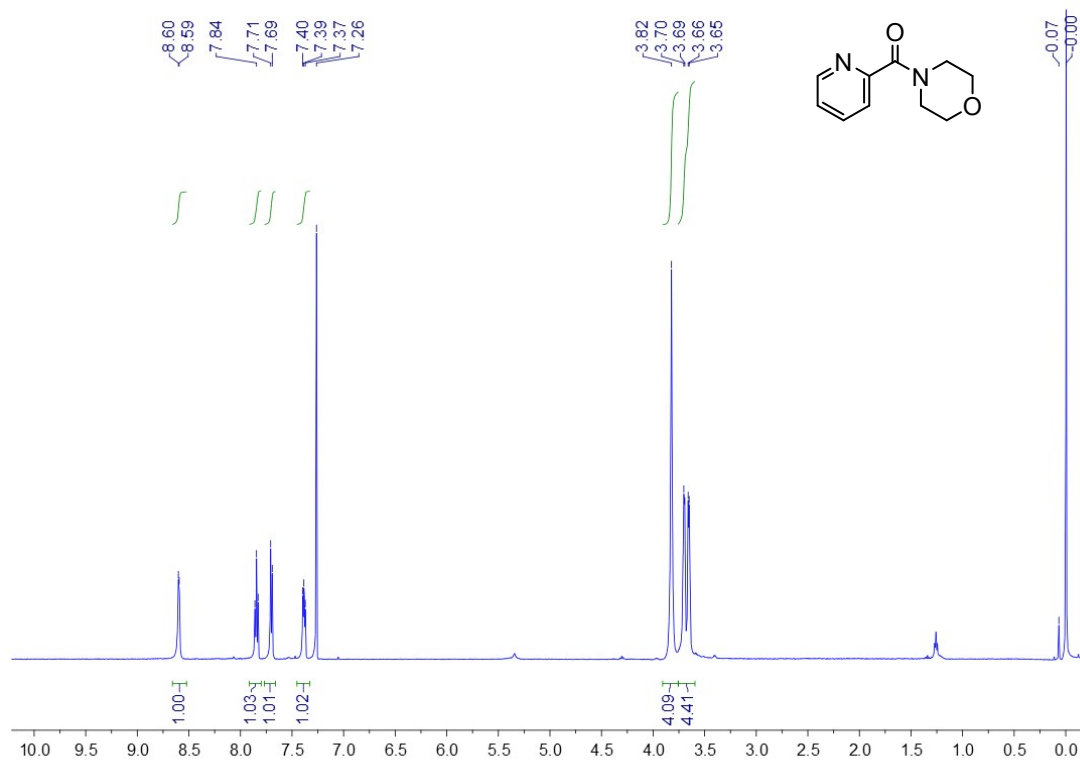

<sup>1</sup>H NMR of *N*-methylpicolinamide **3bd**

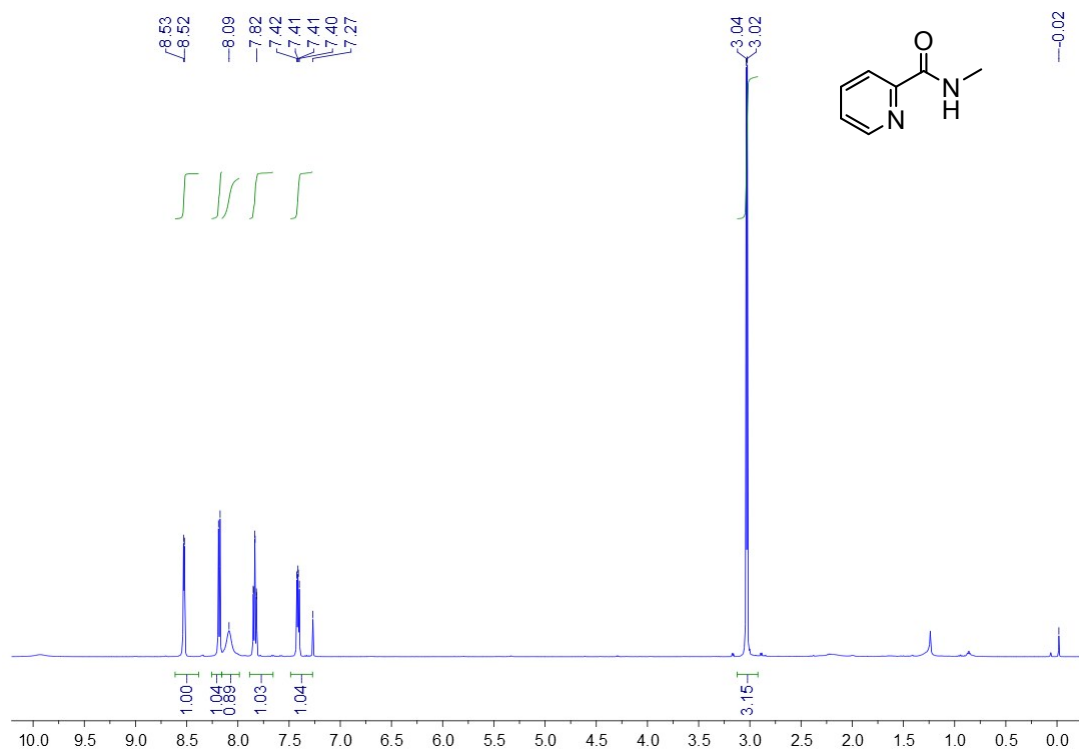

<sup>13</sup>C NMR of *N*-methylpicolinamide **3bd**

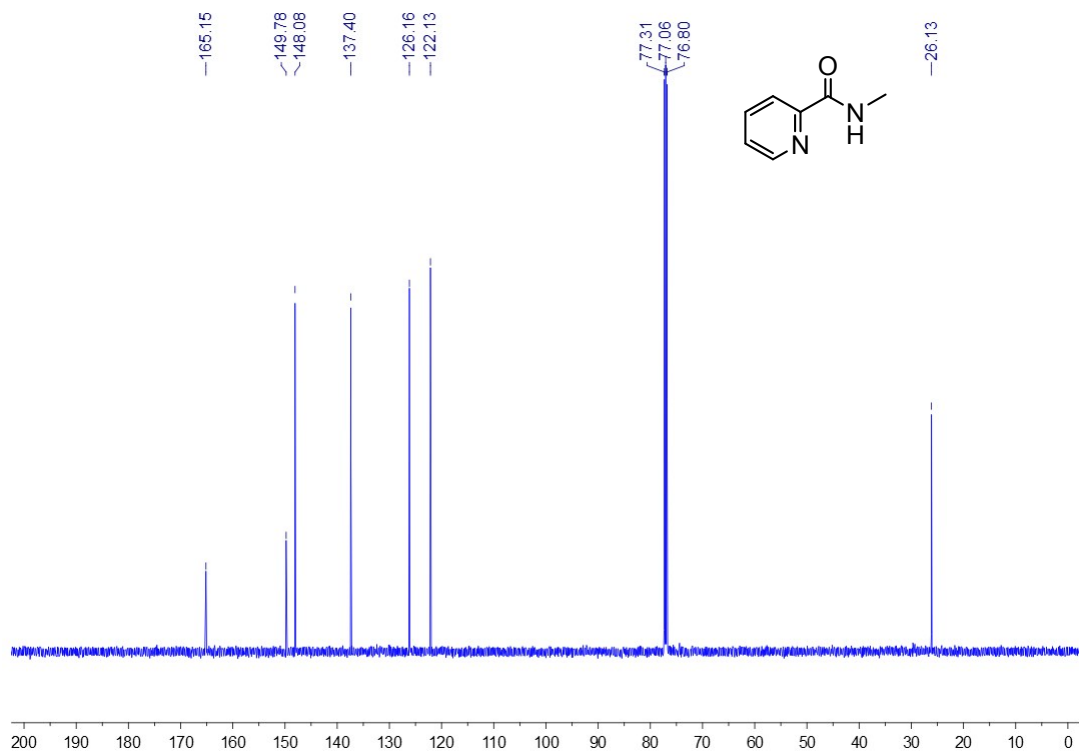

<sup>1</sup>H NMR of N-phenylpicolinamide **3be**

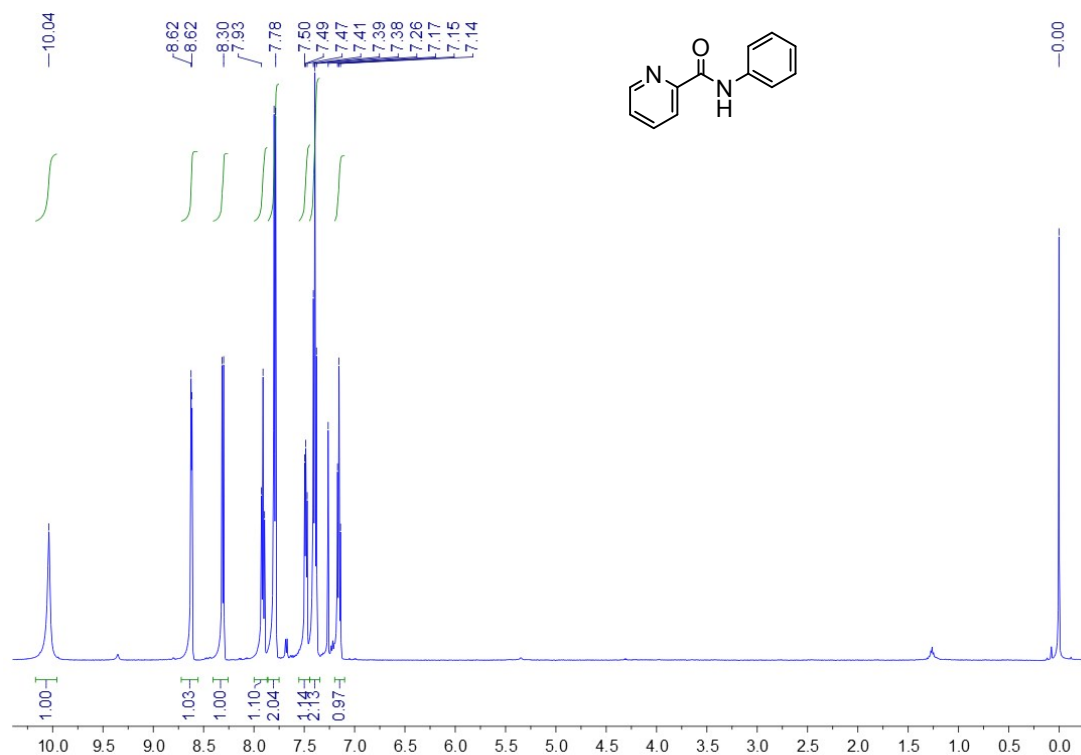

<sup>1</sup>H NMR of 4-cyano-N-methylbenzamide **3nd**

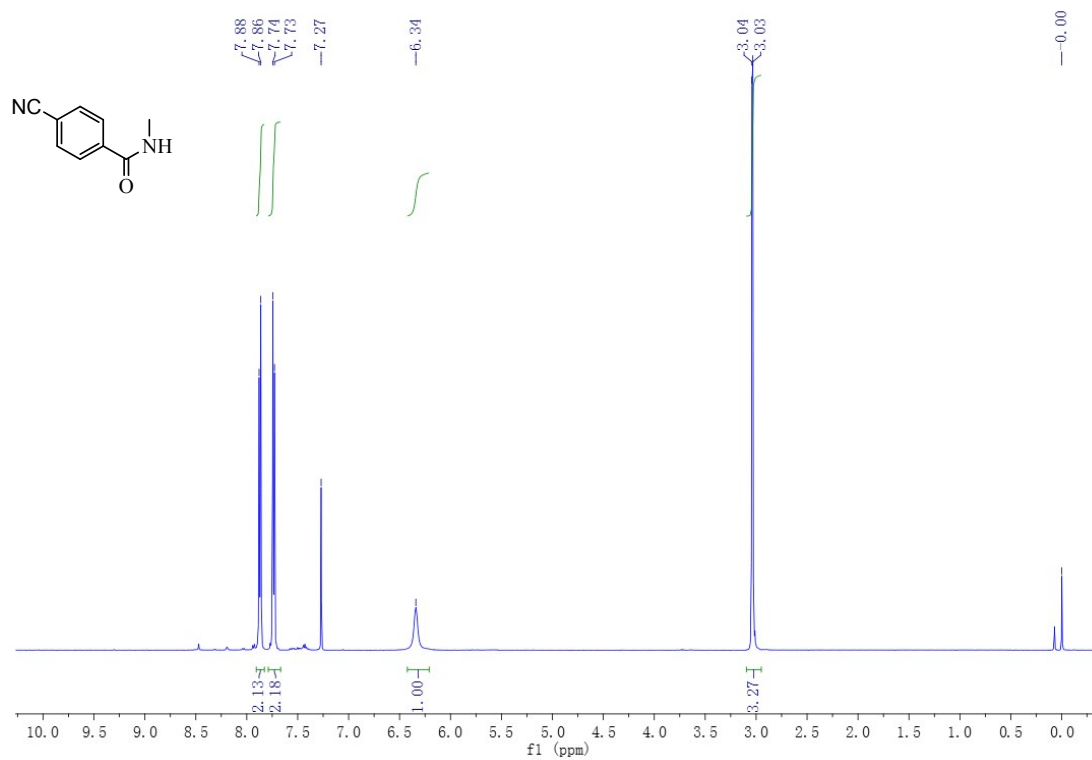

<sup>13</sup>C NMR of 4-cyano-N-methylbenzamide **3nd**

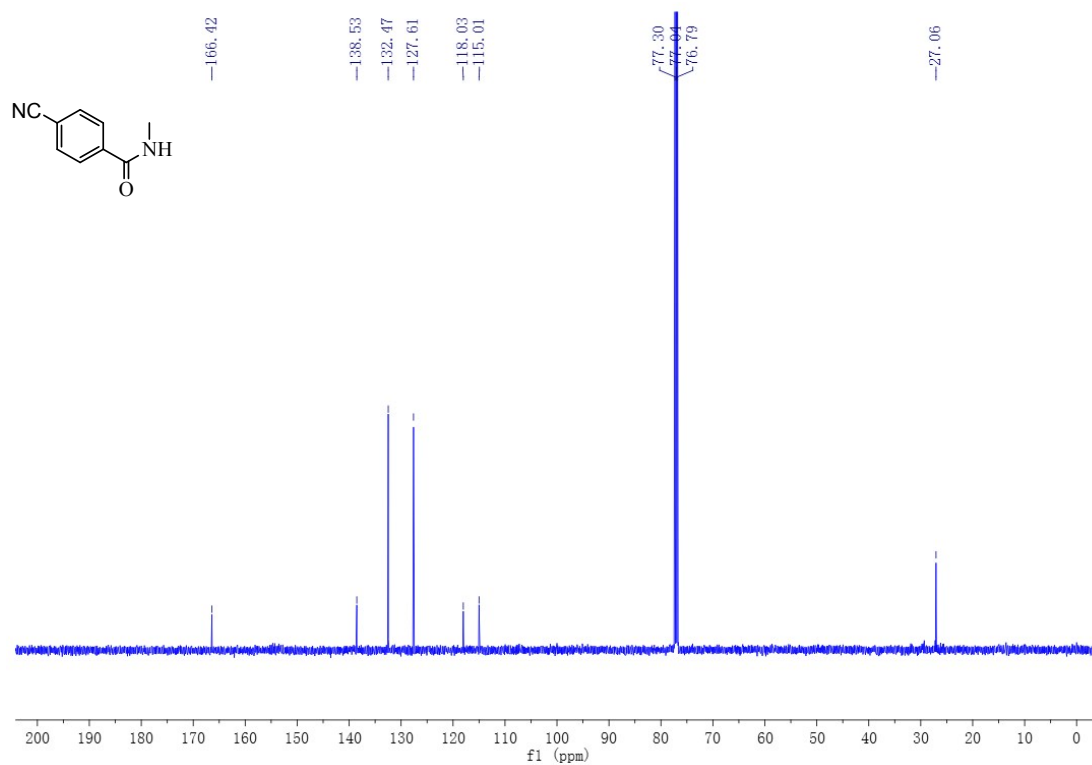

<sup>1</sup>H NMR of 4-cyano-N-phenylbenzamide **3ne**

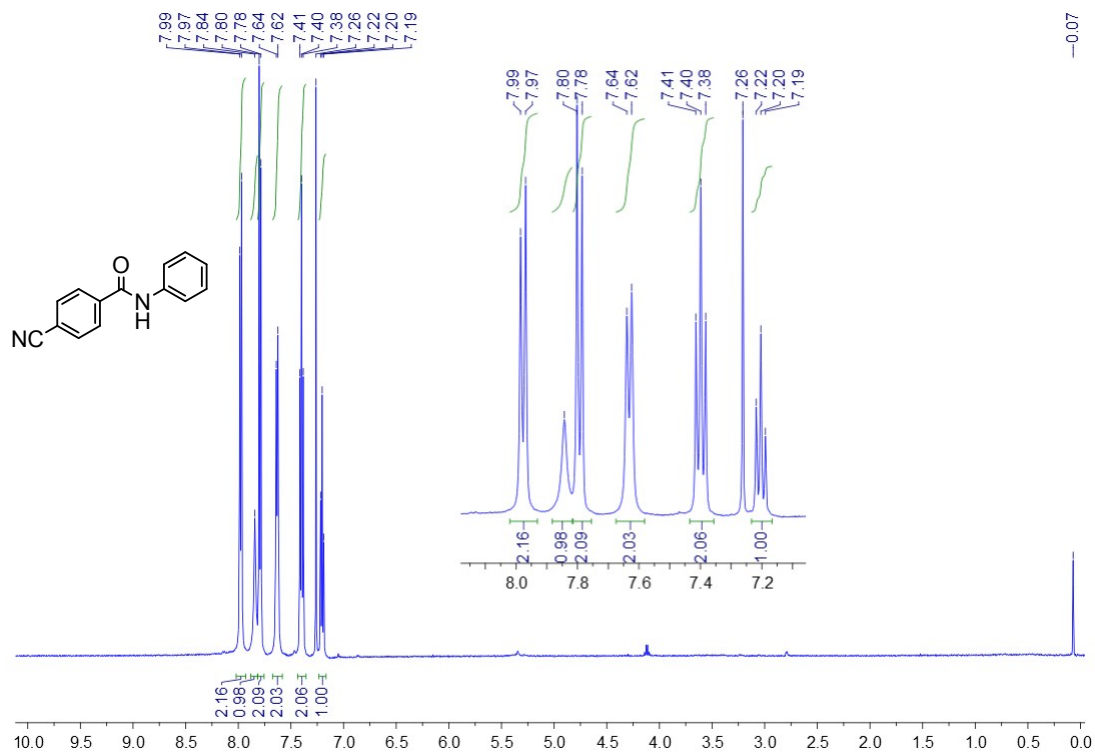



<sup>13</sup>C NMR of 4-cyano-N-phenylbenzamide **3ne**

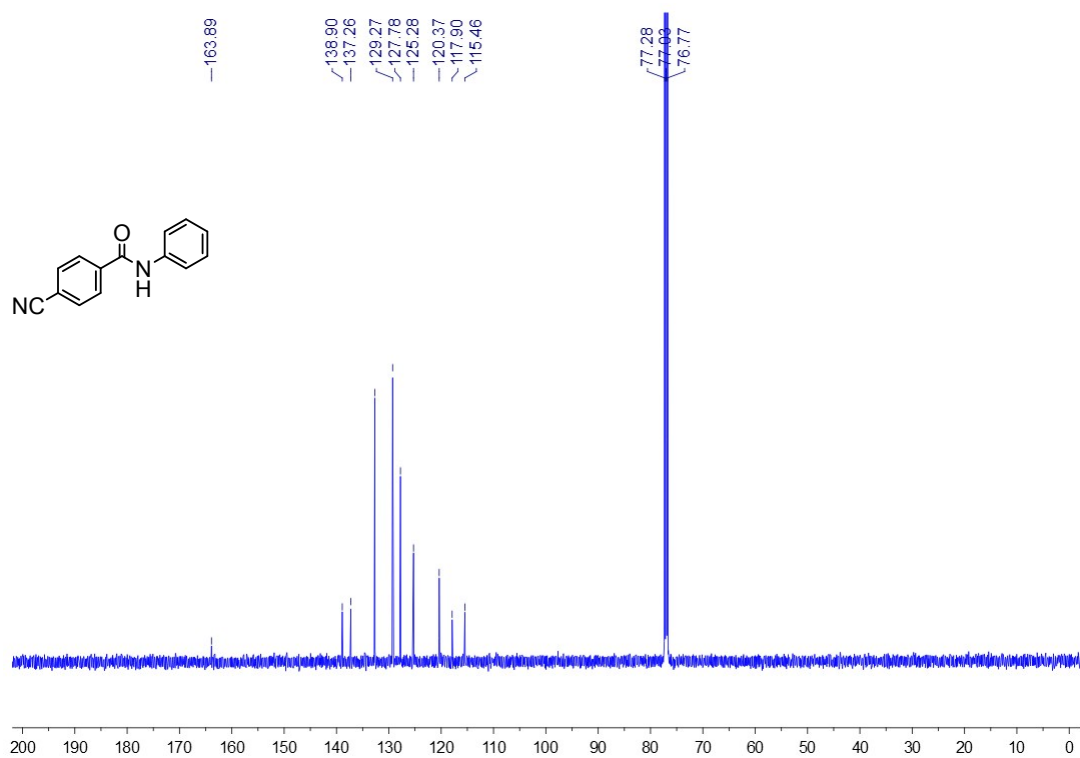

<sup>1</sup>H NMR of 4-cyano-N,N-diethylbenzamide **3nf**

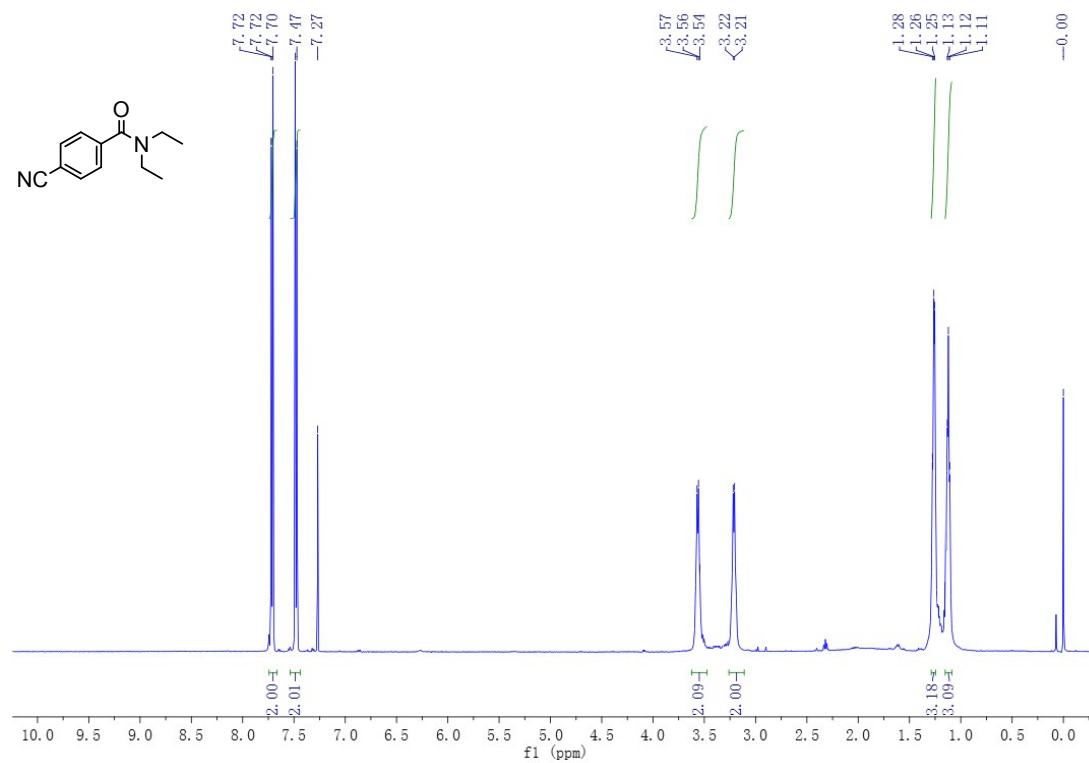

<sup>13</sup>C NMR of 4-cyano-N,N-diethylbenzamide **3nf**

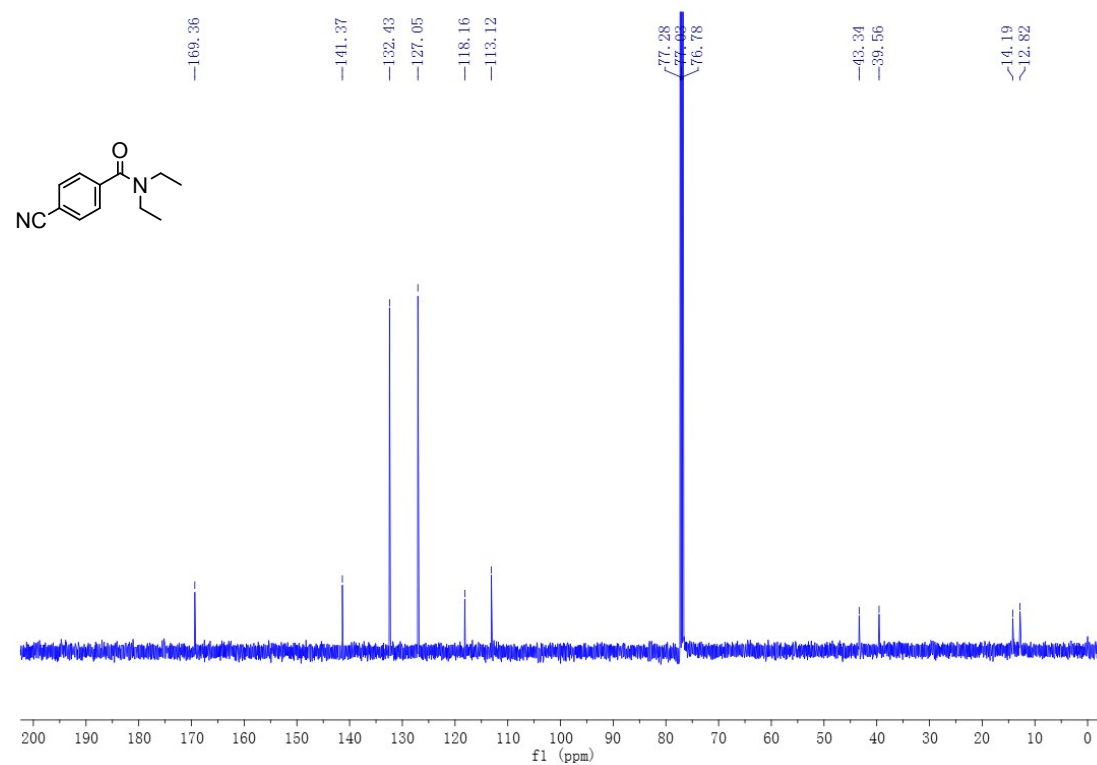

Supplement: c5gc02985f1.pdf [file c5gc02985f1.pdf]
